# Supplementary material for: Characterizing the population structure and genetic diversity of maize breeding germplasm in Southwest China using genome-wide SNP markers
Source: PubMed Central journal article supplement (PMC5007717; doi:10.1186/s12864-016-3041-3), 2016-08-31
Supplement: 12864_2016_3041_MOESM9_ESM.pdf [file 12864_2016_3041_MOESM9_ESM.pdf]

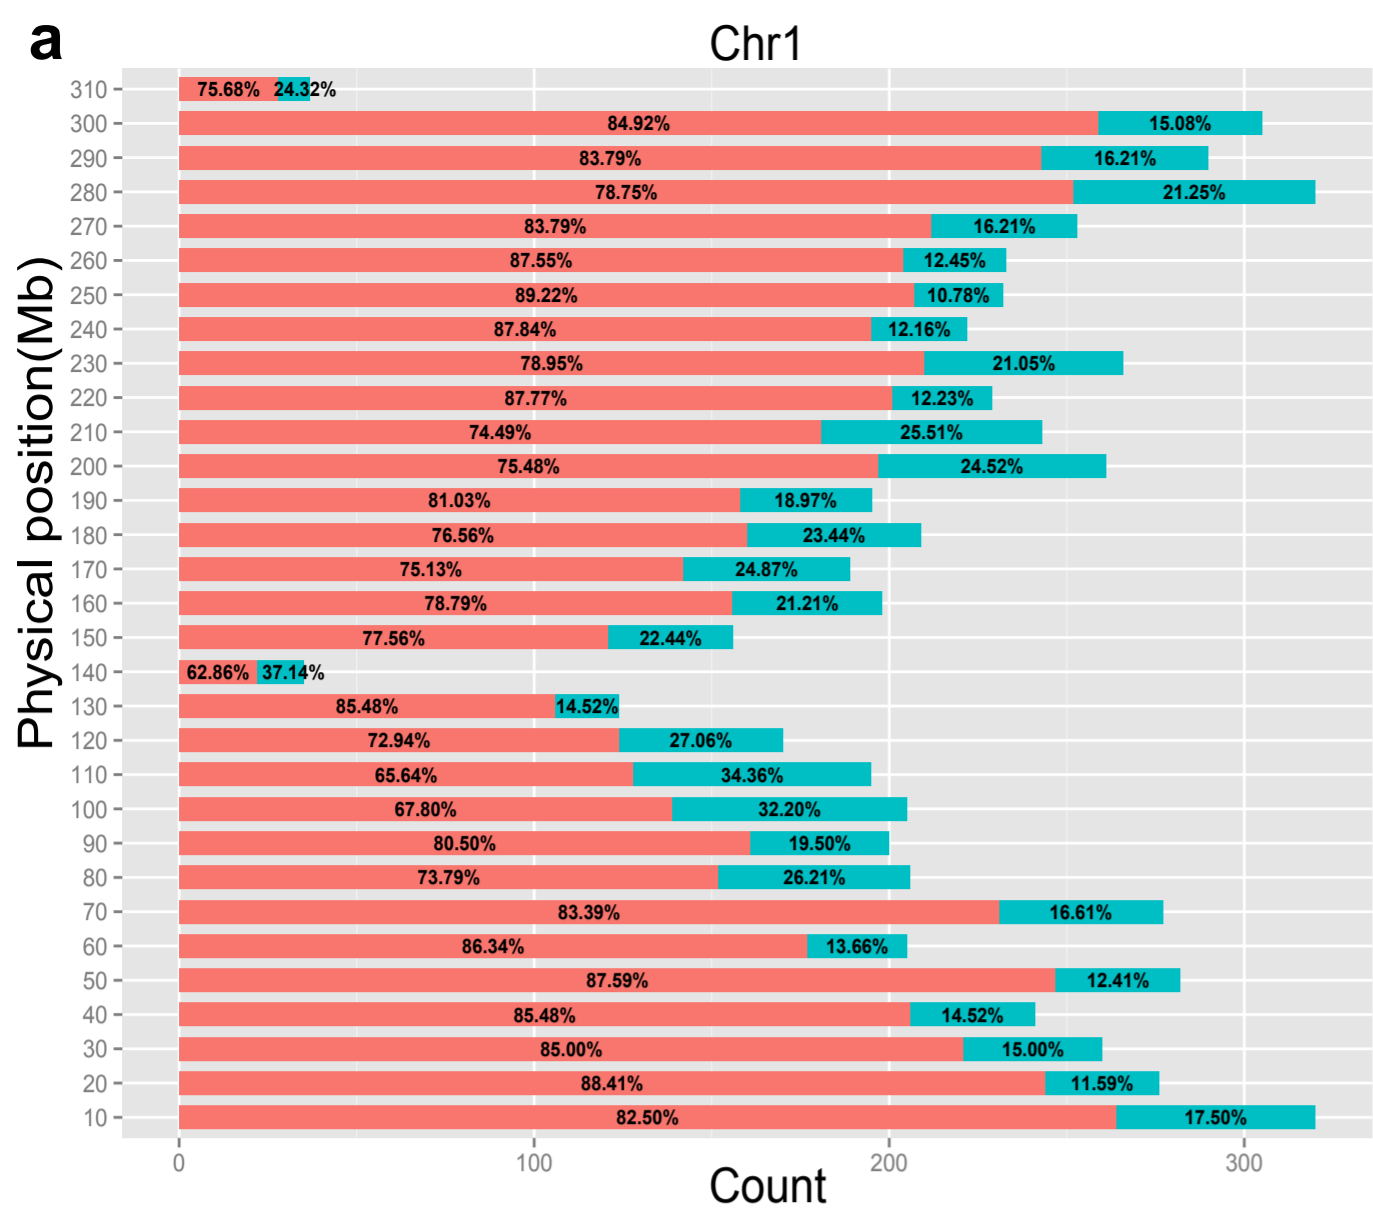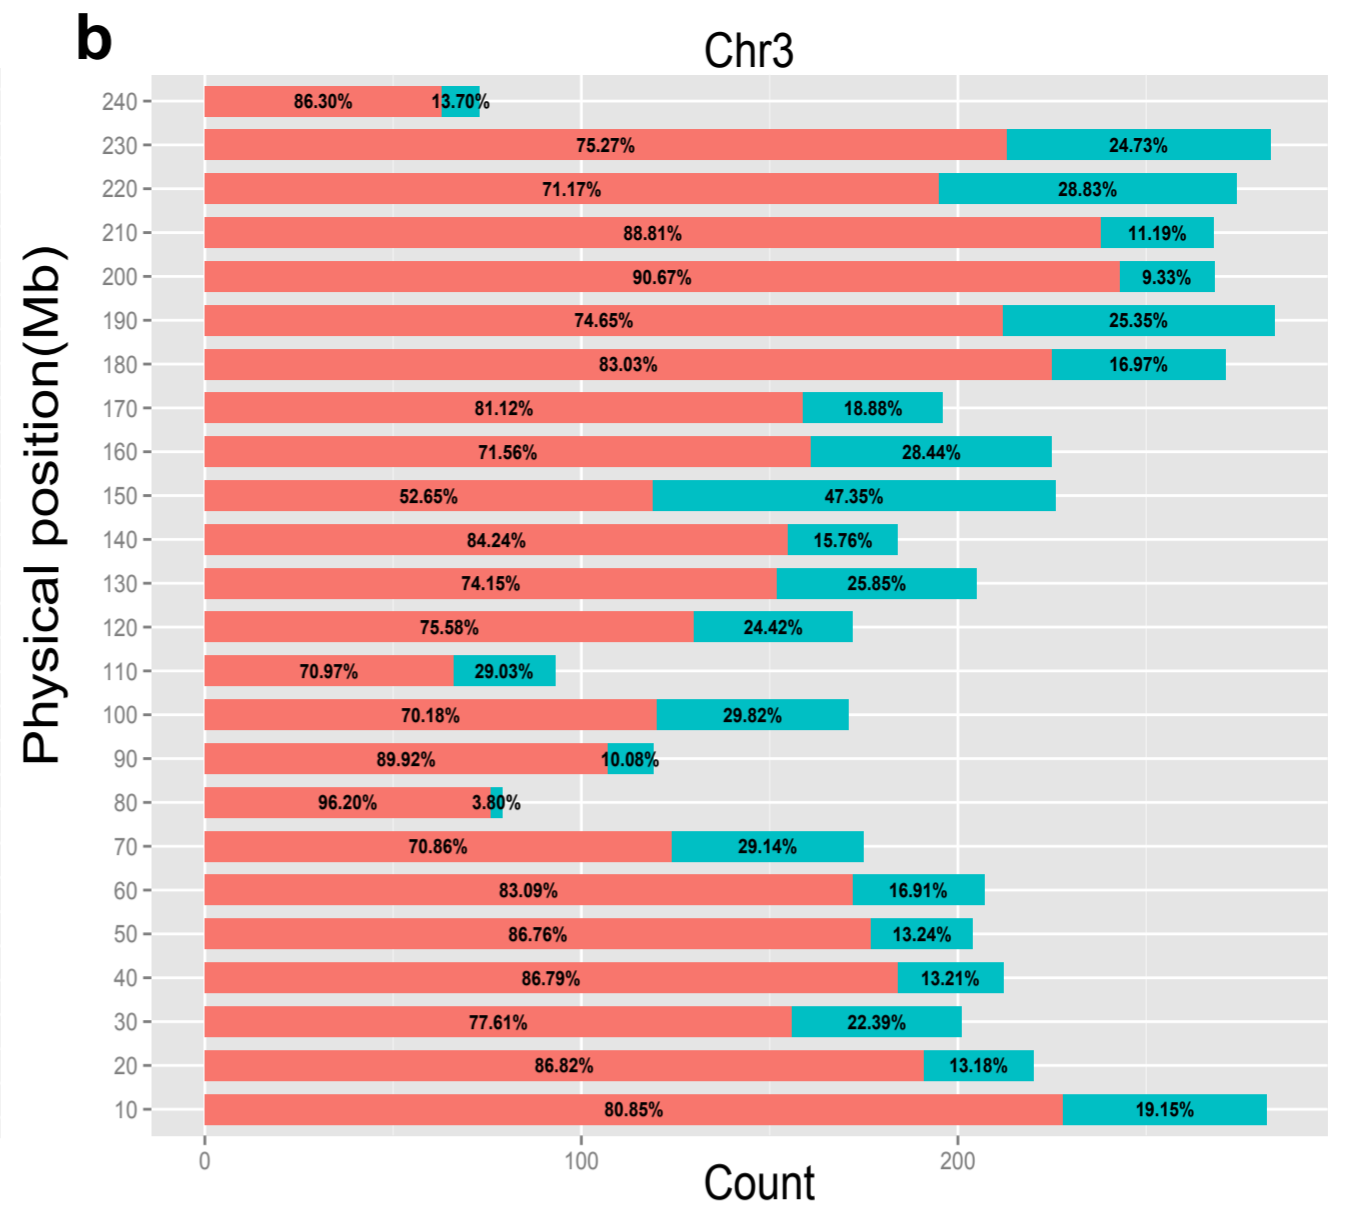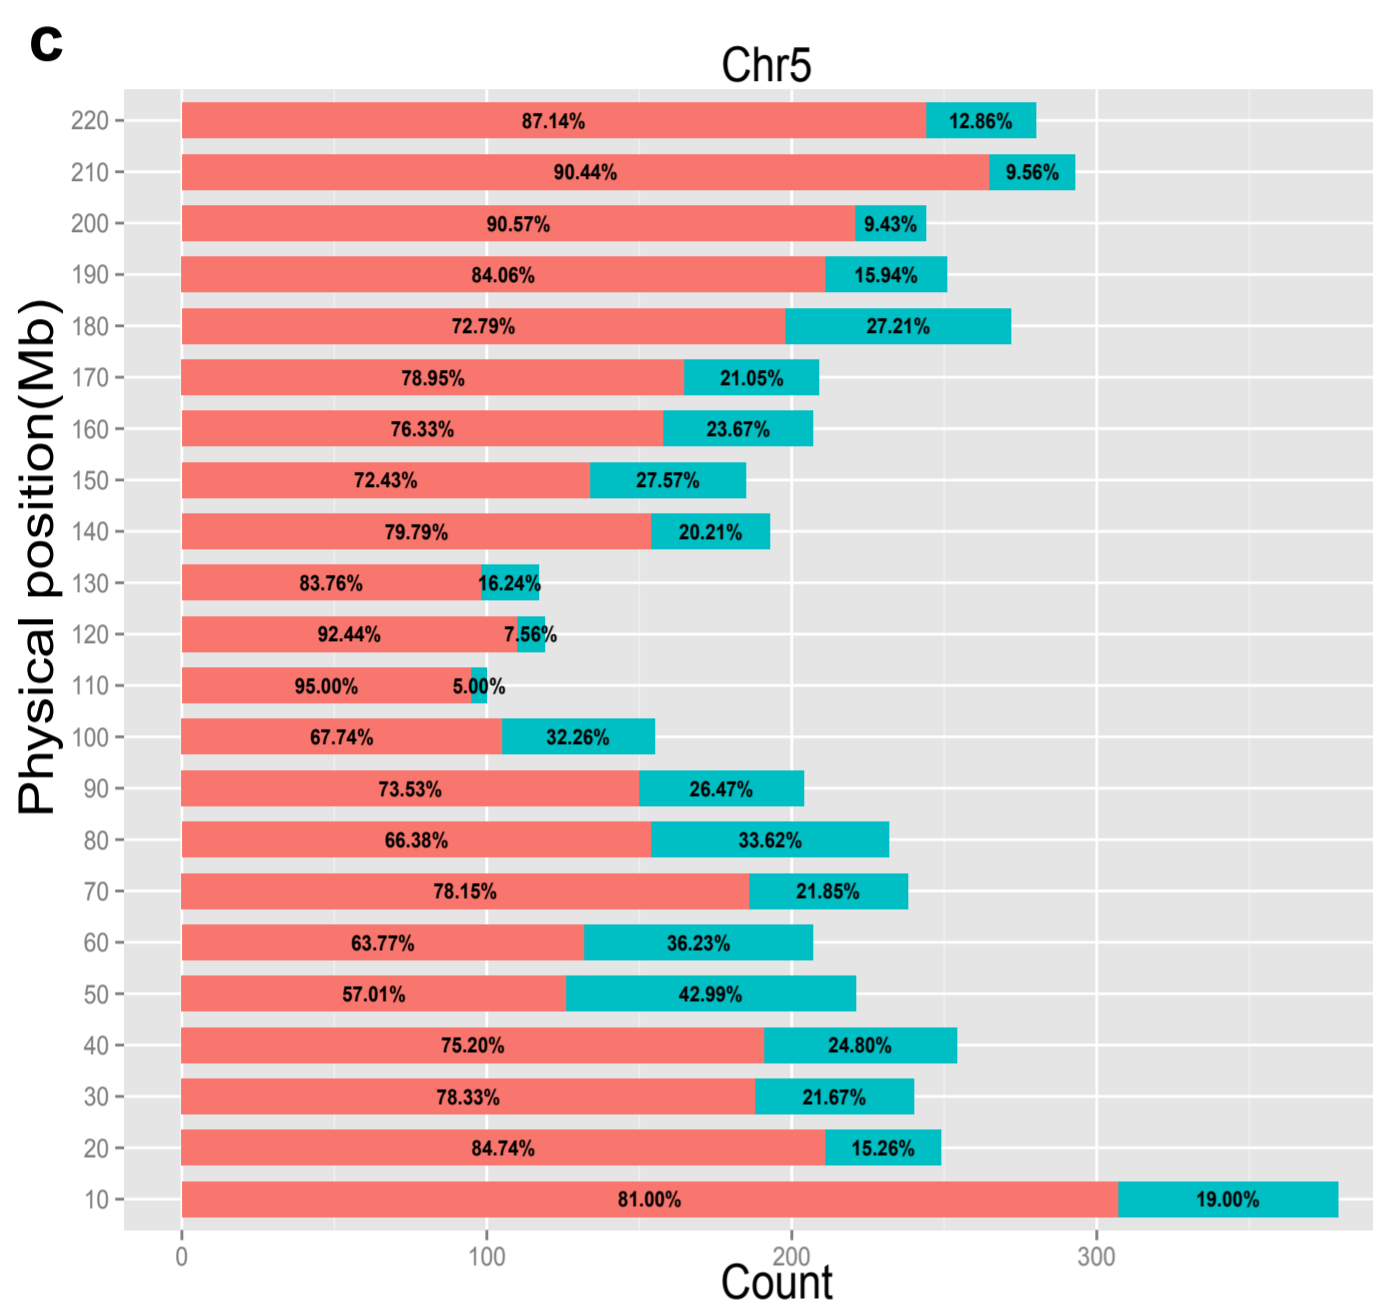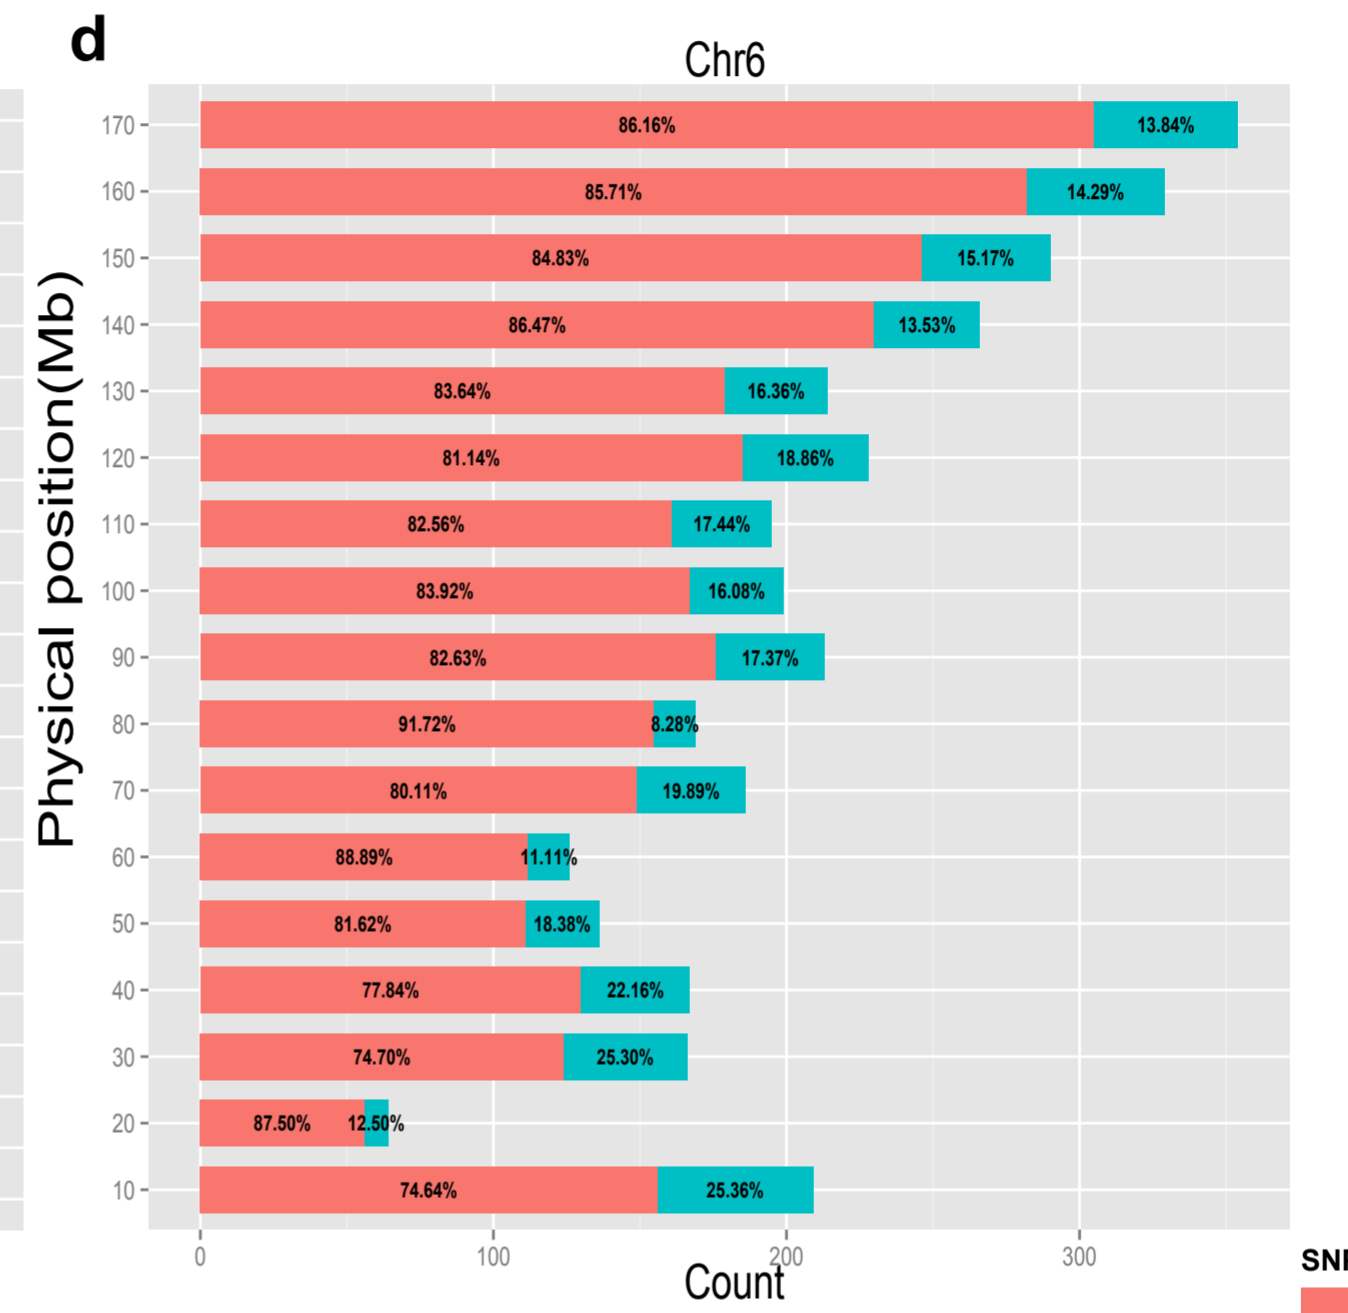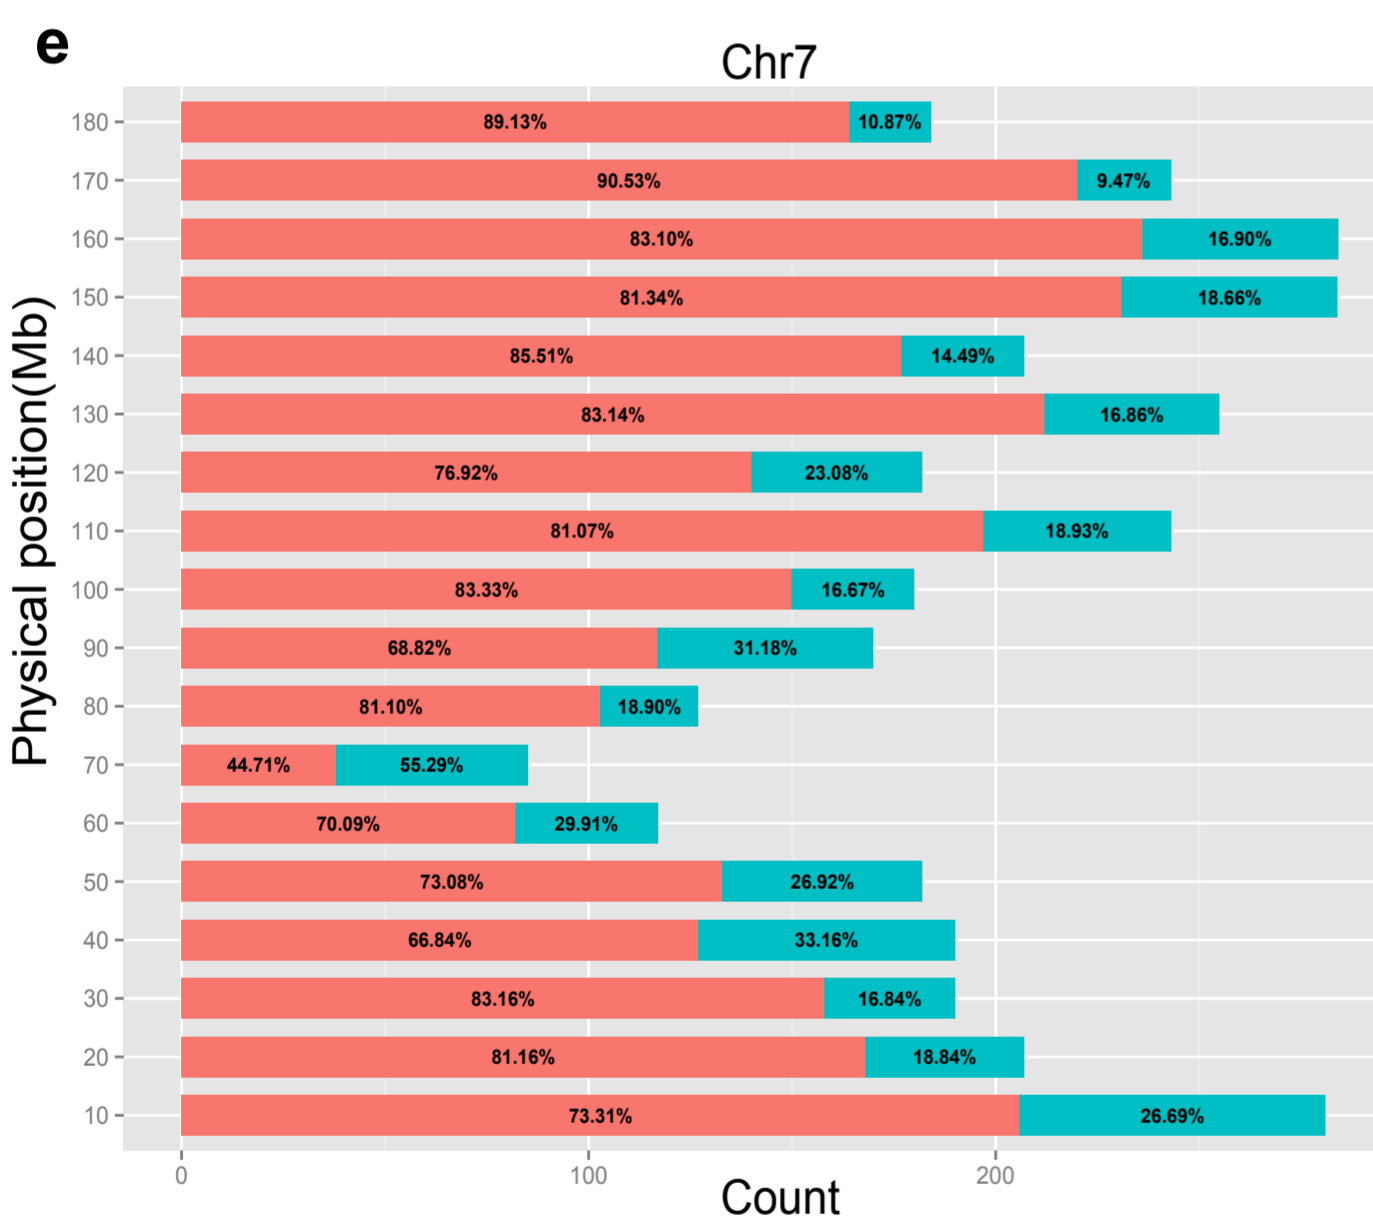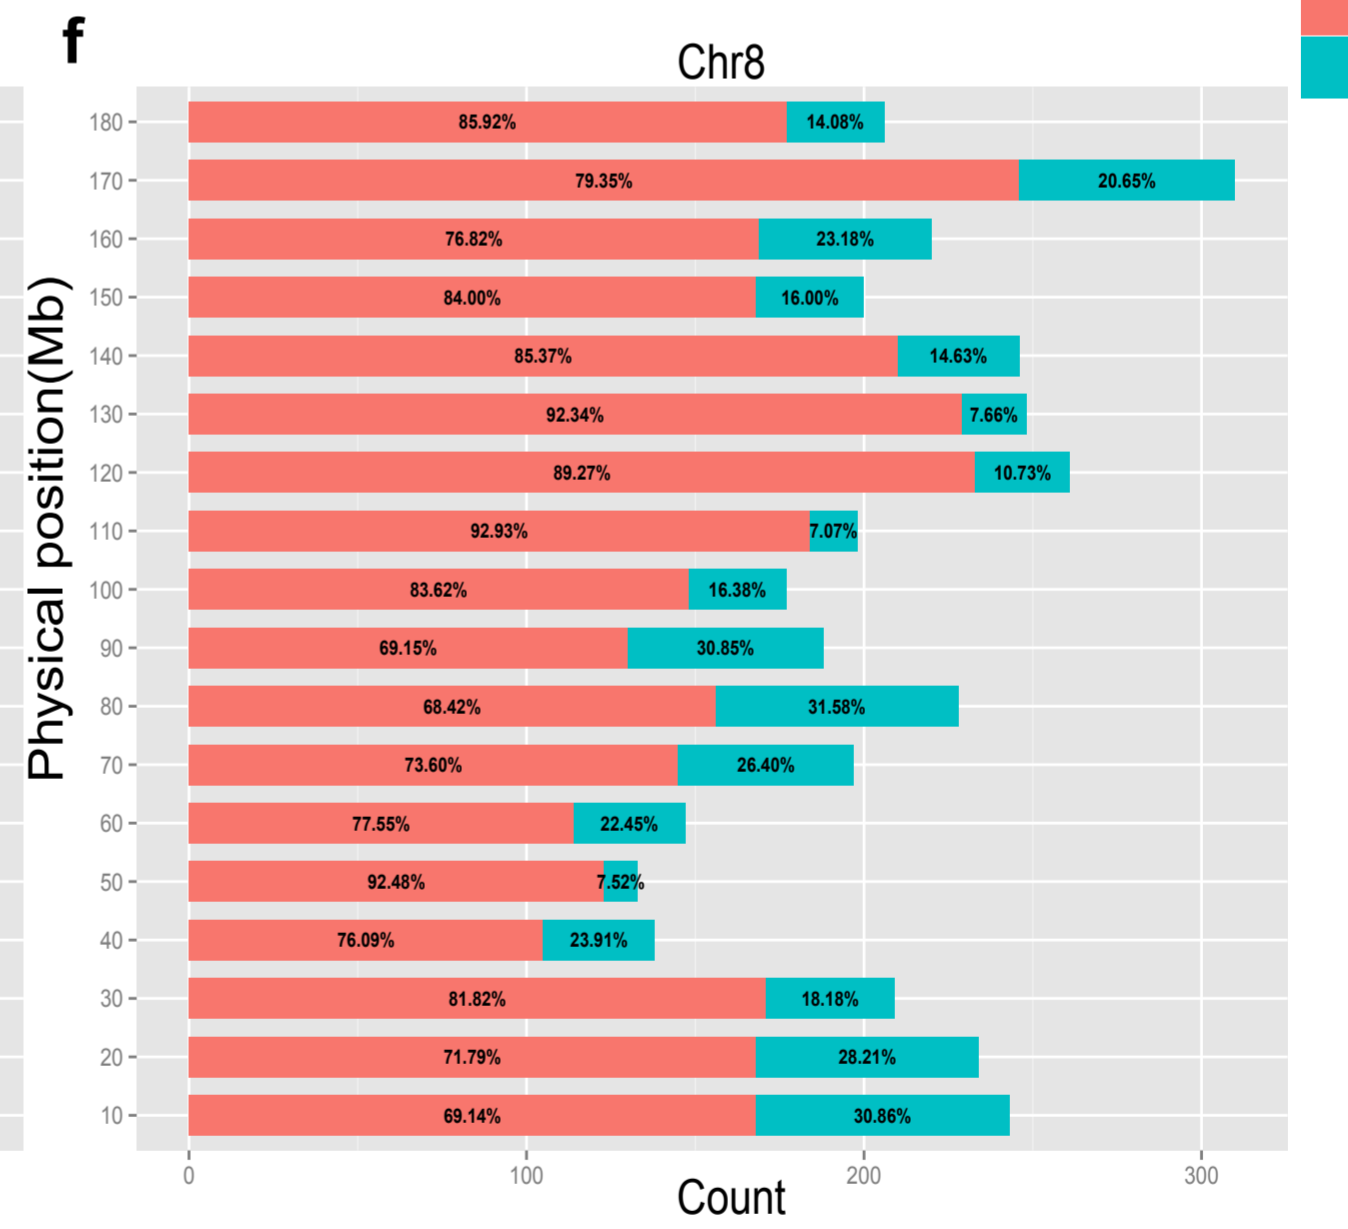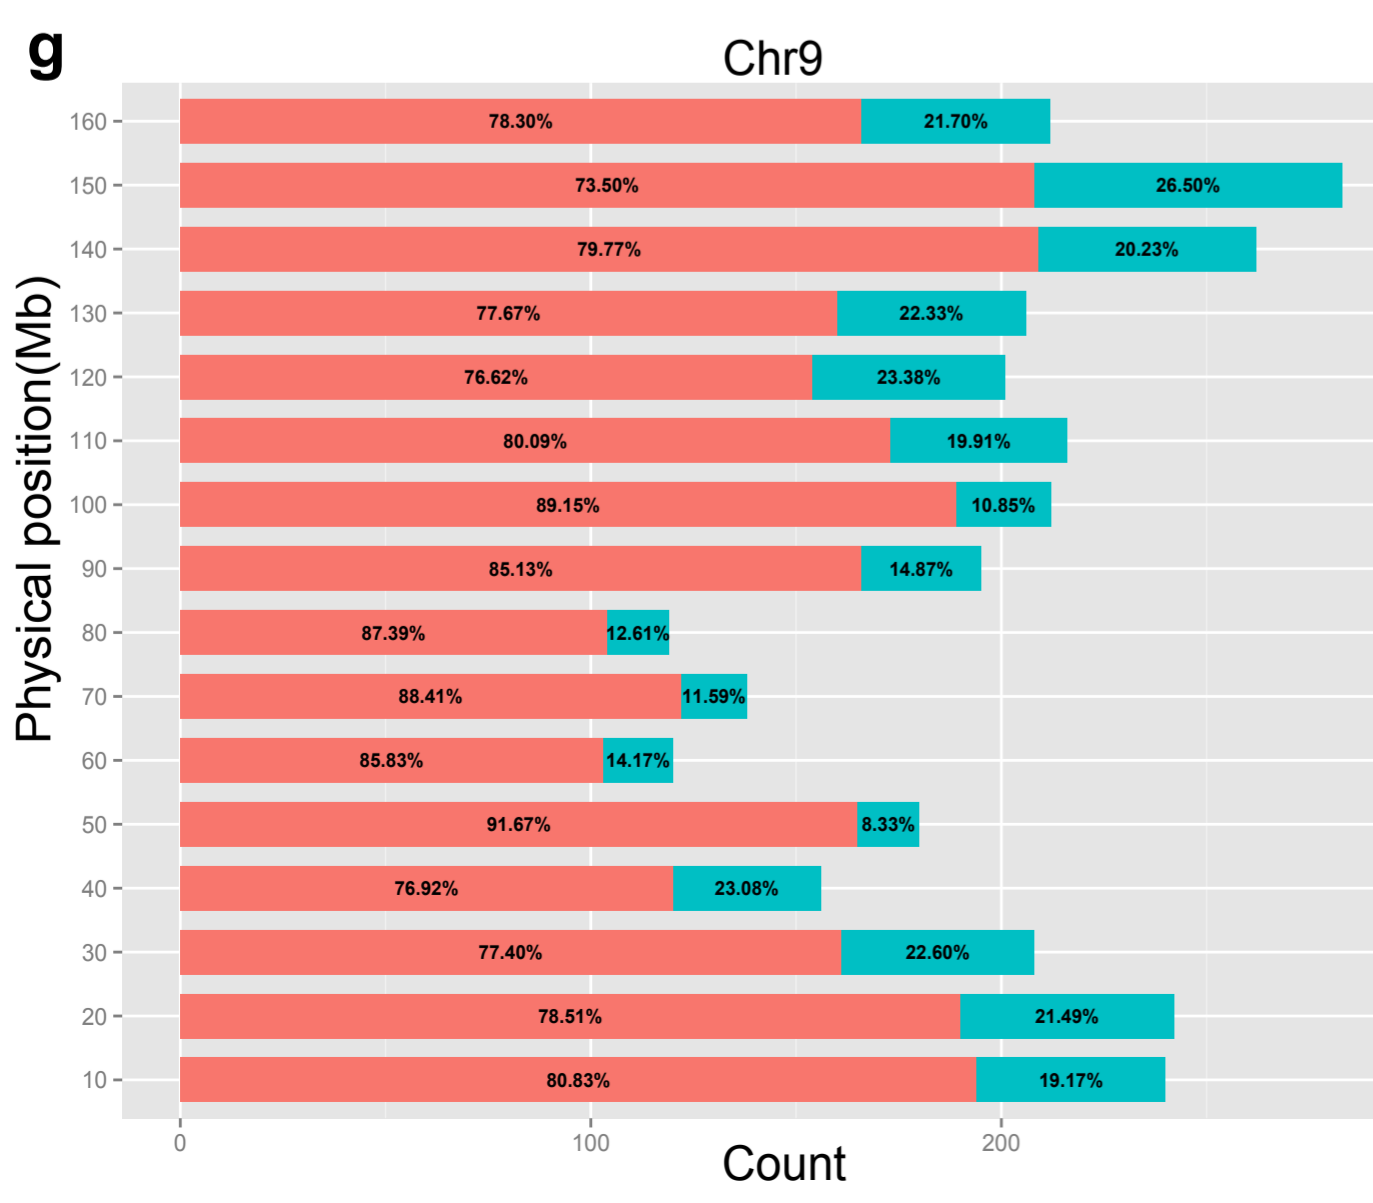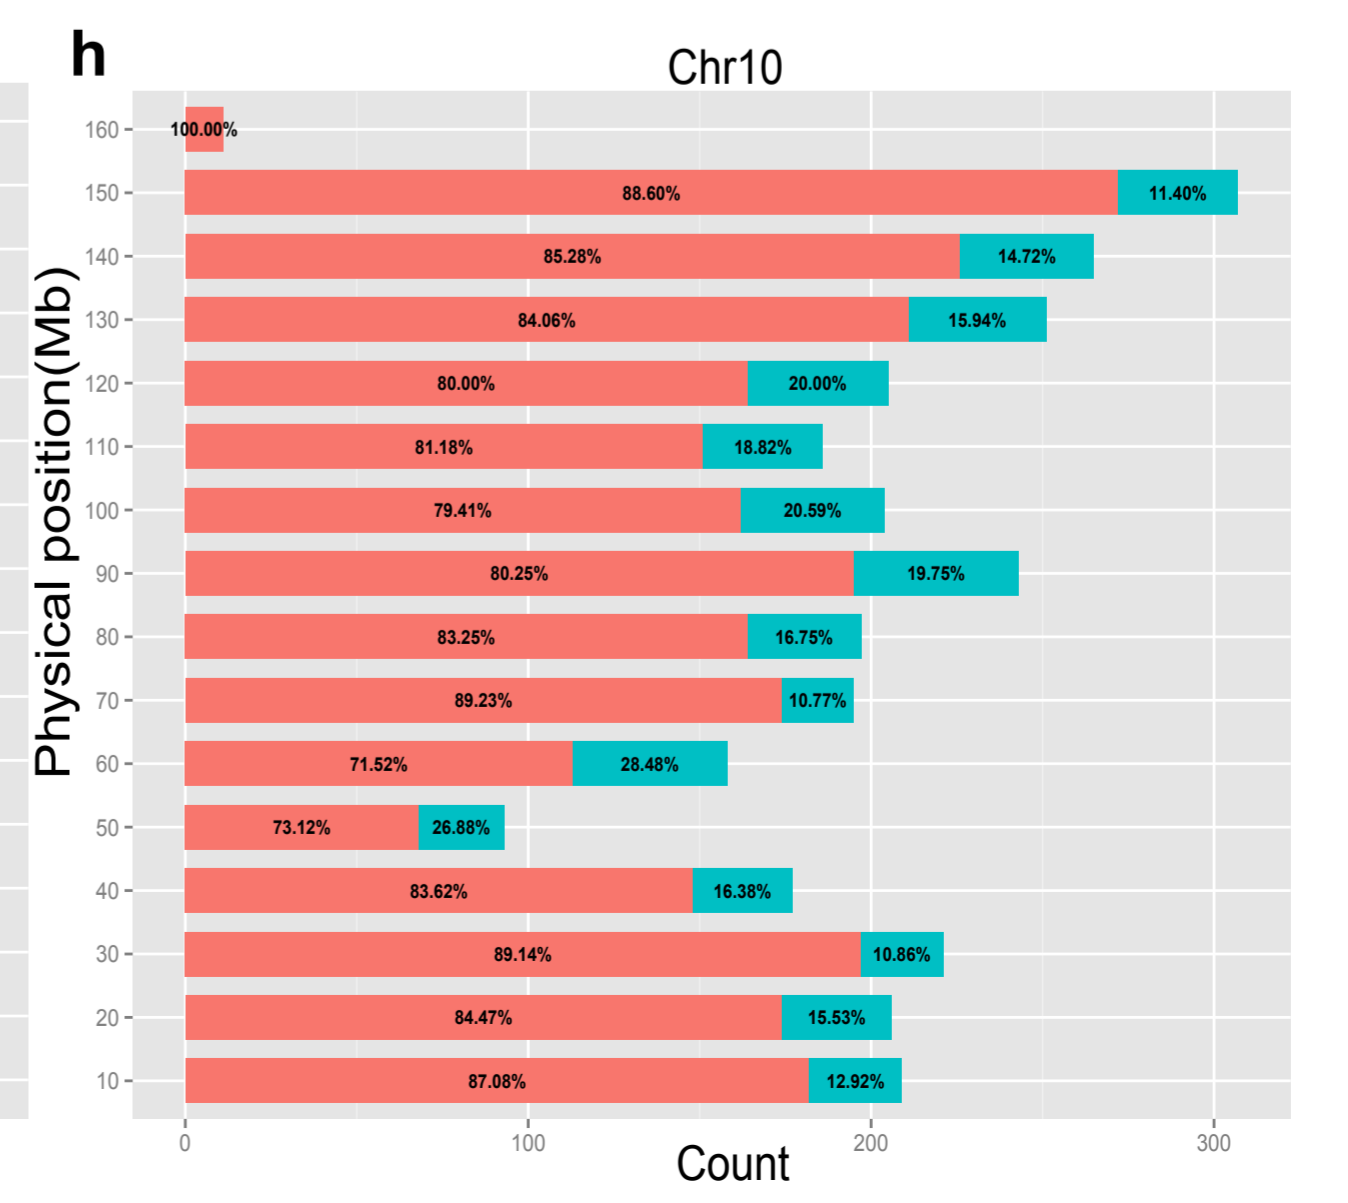

**SNPtype**  
■ Non-variation  
■ Variation
